# Supplementary material for: Bone Marrow Stromal Antigen 2 Is a Novel Plasma Biomarker and Prognosticator for Colorectal Carcinoma: A Secretome-Based Verification Study
Source: Hindawi journal article supplement (doi:10.1155/2015/874054), 2015-01-01
Supplement: f1 [file 874054.f1.pdf]

**Supplemental Table 1. Prioritization and selection of candidate biomarkers from CRC cell secretomes.**

| Category                                                         | Criteria*         | Protein name                                                                    | Gene symbol      | Criterion 1  | Criterion 2 | Criterion 3 | Criterion 4 | Criterion 5 |
|------------------------------------------------------------------|-------------------|---------------------------------------------------------------------------------|------------------|--------------|-------------|-------------|-------------|-------------|
| A                                                                | 1+2 or 1+3        | Tumor-associated calcium signal transducer 2/trophoblast cell surface antigen 2 | TACSTD2/TR OP2** | Yes          | No          | Ref. 1~6    |             | No          |
|                                                                  |                   | Transmembrane 9 superfamily member 2                                            | TM9SF2           | Yes          | Yes         |             |             | No          |
| B                                                                | 1+4 or 2+3 or 2+4 | Tetraspanin-6                                                                   | TSPAN6           | No           | Yes         |             | Ref. 7~9    | No          |
|                                                                  |                   | Bone marrow stromal antigen 2                                                   | BST2             | No           | Yes         | Ref. 10~13  |             | Yes         |
|                                                                  |                   | Tumor necrosis factor receptor superfamily member 16                            | NGFR             | No           | Yes         | Ref. 14~18  |             | No          |
|                                                                  |                   | Glia-activating factor                                                          | FGF9             | No           | Yes         | Ref. 19~23  |             | No          |
|                                                                  |                   | Isoform 3 of Canalicular multispecific organic anion transporter 2              | ABCC3***         | Yes          | No          | Ref. 24~28  |             | No          |
|                                                                  |                   | Cell surface A33 antigen                                                        | GPA33            | No           | Yes         | Ref. 29~33  |             | No          |
|                                                                  |                   | 55 kDa erythrocyte membrane protein                                             | MPP1             | No           | Yes         |             | Ref. 34~37  | No          |
|                                                                  |                   | 142 kDa protein                                                                 | PCDH24           | No           | Yes         | Ref. 38     |             | No          |
|                                                                  |                   | Isoform 2 of Ankyrin repeat-rich membrane spanning protein                      | KIDINS220        | No           | Yes         | Ref. 39     |             | No          |
|                                                                  |                   | Flotillin 2                                                                     | FLOT2            | No           | Yes         | Ref. 40~43  |             | No          |
|                                                                  |                   | Trefoil factor 3                                                                | TFF3             | No           | Yes         | Ref. 44~48  |             | Yes         |
|                                                                  |                   | Isoform long of Antigen KI-67                                                   | MKI67            | No           | Yes         | Ref. 49~52  |             | No          |
|                                                                  |                   | 22 kDa protein                                                                  | TIMP2            | No           | Yes         | Ref. 53~56  |             | No          |
|                                                                  |                   | Claudin-3                                                                       | CLDN3            | No           | Yes         | Ref. 57~62  |             | No          |
|                                                                  |                   | Metallothionein-3                                                               | MT3              | No           | Yes         | Ref. 63~66  |             | No          |
|                                                                  |                   | EPHB6 protein                                                                   | EPHB6            | No           | No          | Ref. 67~71  |             | No          |
|                                                                  |                   | Rho-related BTB domain-containing protein 3                                     | RHOBTB3          | No           | Yes         |             |             | No          |
|                                                                  |                   | Galactoside 3(4)-L-fucosyltransferase                                           | FUT3             | No           | No          | Ref. 72~74  |             | No          |
|                                                                  |                   | Protein VAC14 homolog                                                           | VAC14            | No           | Yes         |             |             | No          |
|                                                                  |                   | Isoform 1 of TRAF2 and NCK-interacting protein kinase                           | TNIK             | No           | Yes         |             |             | No          |
|                                                                  |                   | Isoform 3 of Misshapen-like kinase 1                                            | MINK1            | No           | No          |             | Ref. 75~77  | No          |
|                                                                  |                   | Protein-tyrosine kinase fyn isoform c                                           | FYN              | No           | Yes         |             |             | No          |
|                                                                  |                   | Isoform 2 of protein phosphatase slingshot homolog 3                            | SSH3             | No           | Yes         |             |             | No          |
|                                                                  |                   | Xylosyltransferase 1                                                            | XYLT1****        | Yes          | Yes         |             |             | No          |
|                                                                  |                   | 70 kDa protein                                                                  | SLC6A6           | No           | Yes         |             |             | No          |
|                                                                  |                   | Protein APCDD1                                                                  | APCDD1           | No           | Yes         |             |             | No          |
|                                                                  |                   | Isoform CSBP1 of Mitogen-activated protein kinase 14                            | MAPK14           | No           | Yes         |             |             | No          |
| Ephrin type-B receptor 3                                         | EPHB3             | No                                                                              | Yes              |              |             | No          |             |             |
| Ataxia telangiectasia mutated protein isoform 2                  | ATM               | No                                                                              | Yes              |              |             | No          |             |             |
| Stromal cell-derived factor 2                                    | SDF2              | No                                                                              | No               | Ref. 78~79   |             | No          |             |             |
| Perforin-1                                                       | PRF1              | No                                                                              | No               | Ref. 80      |             | No          |             |             |
| Inhibin beta B chain                                             | INHBB             | No                                                                              | No               | Ref. 81~84   |             | No          |             |             |
| Coagulation factor XIII A chain                                  | F13A1             | No                                                                              | No               | Ref. 85~86   |             | Yes         |             |             |
| Low-density lipoprotein receptor-related protein 4               | LRP4              | No                                                                              | Yes              |              |             | No          |             |             |
| CDC42 binding protein kinase alpha                               | CDC42BPA          | No                                                                              | No               | Ref. 87      |             | No          |             |             |
| Isoform long of Glycylpeptide N-tetradecanoyltransferase 1       | NMT1              | No                                                                              | Yes              |              |             | No          |             |             |
| Cell growth regulator with EF hand domain protein 1              | CGREF1            | No                                                                              | Yes              |              |             | Yes         |             |             |
| Isoform 1 of protein KIAA1199                                    | KIAA1199          | No                                                                              | No               | Ref. 88~90   |             | No          |             |             |
| AP1B1 protein                                                    | AP1B1             | No                                                                              | No               |              | Ref. 91~94  | No          |             |             |
| Ladinin 1                                                        | LAD1              | No                                                                              | Yes              |              |             | No          |             |             |
| Isoform 1 of von Willebrand factor A domain-containing protein 2 | VWA2              | No                                                                              | No               | Ref. 95      |             | Yes         |             |             |
| Isoform 1 of Transmembrane protein 16A                           | TMEM16A           | No                                                                              | No               | Ref. 96~98   |             | No          |             |             |
| Isoform 2 of Condensin-2 complex subunit G2                      | NCAPG2            | No                                                                              | Yes              |              |             | No          |             |             |
| Prostatic acid phosphatase                                       | ACPP              | No                                                                              | Yes              |              |             | No          |             |             |
| 9 kDa protein                                                    | RPS27             | No                                                                              | No               | Ref. 99~102  |             | No          |             |             |
| Isoform 2 of General transcription factor 3C polypeptide 5       | GTF3C5            | No                                                                              | No               | Ref. 103~104 |             | No          |             |             |
| Isoform 2 of Transmembrane and TPR repeat-containing protein 3   | TMTC3             | No                                                                              | Yes              |              |             | No          |             |             |
| Catenin, beta like 1                                             | CTNNBL1           | No                                                                              | Yes              |              |             | No          |             |             |

|                                                                                 |         |    |     |              |          |
|---------------------------------------------------------------------------------|---------|----|-----|--------------|----------|
| Ras GTPase-activating-like protein IQGAP3                                       | IQGAP3  | No | No  | Ref. 105~107 | Yes      |
| Isoform 1 of PDZ domain-containing protein 11                                   | PDZD11  | No | Yes |              | No       |
| Lipocalin 2                                                                     | LCN2    | No | Yes |              | No       |
| cDNA FLJ46245 fis, clone TESTI4020596, highly similar to Homo sapiens calpain 5 | CAPN5   | No | No  | Ref. 108~109 | No       |
| Proliferating-cell nucleolar antigen p120                                       | NOL1    | No | No  | Ref. 110~112 | No       |
| Isoform 1 of Pregnancy-specific beta-1-glycoprotein 11                          | PSG11   | No | No  | Ref. 113~115 | No       |
| Isoform 1 of Choline transporter-like protein 1                                 | SLC44A1 | No | No  | Ref. 116     | No       |
| Phosphoglycerate mutase 2                                                       | PGAM2   | No | No  | Ref. 117~118 | Yes      |
| Isoform A of Nucleoporin SEH1-like                                              | SEH1L   | No | Yes |              | No       |
| Fibroblast growth factor 19                                                     | FGF19   | No | No  | Ref. 119~120 | No       |
| Isoform 2 of Chloride intracellular channel protein 5                           | CLIC5   | No | No  | Ref. 121     | No       |
| 36 kDa protein                                                                  | MFNG    | No | No  |              | Ref. 122 |
| Eukaryotic translation initiation factor 1A, Y-chromosomal                      | EIF1AY  | No | Yes |              | Yes      |
| Calcium and integrin-binding protein 1                                          | CIB1    | No | Yes |              | No       |
| Neutral amino acid transporter A                                                | SLC1A4  | No | Yes |              | No       |
| Receptor-type tyrosine-protein phosphatase epsilon precursor                    | PTPRE   | No | Yes |              | No       |

\* Criteria:

- (1) proteins detected in the high-confidence human plasma proteome reference set established in 2006 [States et al., 2006]
- (2) proteins overexpressed in CRC tissue specimens in the Human Protein Atlas (HPA) dataset [Bjorling et al., 2008]
- (3) proteins up-regulated in CRC in published references
- (4) functions as secreted proteins, or involving in apoptosis/signal transduction
- (5) proteins detected in the high-confidence human plasma proteome reference set established in 2011 [Farrah et al., 2011]
- (6) proteins overexpressed in CRC tissue specimens in the Human Protein Atlas (HPA) dataset, Protein Atlas version 13 - 2014.11.06

\*\* TACSTD2(TROP2) was enrolled in Protein Atlas version 12 - 2013.12.05

\*\*\* ABCC3 was set in category B due to previous literature lacking positive association in CRC.

\*\*\*\* XYLT1 was set in category C because it is an enzyme which was not a favorable candidate for cancer biomarker.

References:

- 1 Identification of Trop-2 as an oncogene and an attractive therapeutic target in colon cancers. Wang J, Day R, Dong Y, Weintraub SJ, Michel L. *Mol Cancer* 1
- 2 Clinical significance of TROP2 expression in colorectal cancer. Ohmachi T, Tanaka F, Mimori K, Inoue H, Yanaga K, Mori M. *Clin Cancer Res.* 2006 May 1
- 3 Overexpression of TROP2 predicts poor prognosis of patients with cervical cancer and promotes the proliferation and invasion of cervical cancer cells by reg
- 4 Aberrant expression of novel and previously described cell membrane markers in human breast cancer cell lines and tumors. Huang H, Groth J, Sossey-Alaou
- 5 Elevated expressions of MMP7, TROP2, and survivin are associated with survival, disease recurrence, and liver metastasis of colon cancer. Fang YJ, Lu ZH,
- 6 High expression of TROP2 correlates with poor prognosis in pancreatic cancer. Fong D, Moser P, Krammel C, Gostner JM, Margreiter R, Mitterer M, Gastl
- 7 The tetraspanin superfamily: molecular facilitators. Maecker HT, Todd SC, Levy S. *FASEB J.* 1997 May;11(6):428-42. Review.
- 8 Tetraspanin functions and associated microdomains. Hemler ME. *Nat Rev Mol Cell Biol.* 2005 Oct;6(10):801-11. Review.
- 9 Membrane microdomains and proteomics: lessons from tetraspanin microdomains and comparison with lipid rafts. Le Naour F, André M, Boucheix C, Rubins
- 10 Up-regulation of bone marrow stromal protein 2 (BST2) in breast cancer with bone metastasis. Cai D, Cao J, Li Z, Zheng X, Yao Y, Li W, Yuan Z. *BMC Ca*
- 11 Generation of potent antitumor CTL from patients with multiple myeloma directed against HM1.24. Rew SB, Peggs K, Sanjuan I, Pizzey AR, Koishihara Y, I
- 12 Plasma membrane proteomics identifies bone marrow stromal antigen 2 as a potential therapeutic target in endometrial cancer. Yokoyama T, Enomoto T, Serz
- 13 Immunotherapy of multiple myeloma with a monoclonal antibody directed against a plasma cell-specific antigen, HM1.24. Ozaki S, Kosaka M, Wakatsuki S,
- 14 DNA methylation biomarkers for blood-based colorectal cancer screening. Lofton-Day C, Model F, Devos T, Tetzner R, Distler J, Schuster M, Song X, Lesc
- 15 Distribution and significance of nerve growth factor receptor (NGFR/p75NTR) in normal, benign and malignant breast tissue. Reis-Filho JS, Steele D, Di Palr
- 16 trk and ret proto-oncogene expression in human neuroblastoma specimens: high frequency of trk expression in non-advanced stages. Borrello MG, Bongarzon
- 17 A survey of immunohistochemical biomarkers for basal-like breast cancer against a gene expression profile gold standard. Won JR, Gao D, Chow C, Cheng J
- 18 Patterns of expression and function of the p75(NGFR) protein in pancreatic cancer cells and tumours. Wang W, Zhao H, Zhang S, Kang E, Chen Y, Ni C, Zh
- 19 Fibroblast growth factor 9 has oncogenic activity and is a downstream target of Wnt signaling in ovarian endometrioid adenocarcinomas. Hendrix ND, Wu R,
- 20 Expression and growth stimulatory effect of fibroblast growth factor 9 in human brain tumors. Todo T, Kondo T, Kirino T, Asai A, Adams EF, Nakamura S, I
- 21 Expression of FGF and FGF receptor genes in human breast cancer. Penault-Llorca F, Bertucci F, Adelaide J, Parc P, Coulier F, Jacquemier J, Birnbaum D, d
- 22 Aryl hydrocarbon receptor activation and overexpression upregulated fibroblast growth factor-9 in human lung adenocarcinomas. Wang CK, Chang H, Chen I
- 23 miR-26a suppresses tumor growth and metastasis by targeting FGF9 in gastric cancer. Deng M, Tang HL, Lu XH, Liu MY, Lu XM, Gu YX, Liu JF, He ZM.
- 24 Involvement of drug transporters in the synergistic action of FOLFOX combination chemotherapy. Theile D, Grebhardt S, Haefeli WE, Weiss J. *Biochem Pha*
- 25 Expression profiling of ABC transporters in a drug-resistant breast cancer cell line using AmpArray. Liu Y, Peng H, Zhang JT. *Mol Pharmacol.* 2005 Aug;68(
- 26 ABCC3 as a marker for multidrug resistance in non-small cell lung cancer. Zhao Y, Lu H, Yan A, Yang Y, Meng Q, Sun L, Pang H, Li C, Dong X, Cai L. *Sc*
- 27 Gene dosage alterations revealed by cDNA microarray analysis in cervical cancer: identification of candidate amplified and overexpressed genes. Narayan G,
- 28 ABCC drug efflux pumps and organic anion uptake transporters in human gliomas and the blood-tumor barrier. Bronger H, Konig J, Kopplow K, Steiner HH,
- 29 Colon tumour secretome: insights into endogenous proteolytic cleavage events in the colon tumour microenvironment. Greening DW, Kapp EA, Ji H, ;
- 30 Search for epithelial-specific mRNAs in peripheral blood of patients with colon cancer by RT-PCR. Solmi R, De Sanctis P, Zucchini C, Ugolini G, Rosati G,
- 31 EpCAM and gpA33 are markers of Barrett's metaplasia. Wong NA, Warren BF, Piris J, Maynard N, Marshall R, Bodmer WF. *J Clin Pathol.* 2006 Mar;59(3):
- 32 KLF4-dependent, PPARgamma-induced expression of GPA33 in colon cancer cell lines. Rageul J, Mottier S, Jarry A, Shah Y, Theoleyre S, Masson D, Gonz
- 33 A novel A33 promoter-based conditionally replicative adenovirus suppresses tumor growth and eradicates hepatic metastases in human colon cancer models.
- 34 Identification of the protein 4.1 binding interface on glycophorin C and p55, a homologue of the Drosophila discs-large tumor suppressor protein. Marfatia SA
- 35 Complete genomic organization of the human erythroid p55 gene (MPP1), a membrane-associated guanylate kinase homologue. Kim AC, Metzberg AB, S
- 36 Molecular identification of a major palmitoylated erythrocyte membrane protein containing the src homology 3 motif. Ruff P, Speicher DW, Husain-Chishti A
- 37 The PDZ domain of human erythrocyte p55 mediates its binding to the cytoplasmic carboxyl terminus of glycophorin C. Analysis of the binding interface by i
- 38 PCDH24-induced contact inhibition involves downregulation of beta-catenin signaling. Ose R, Yanagawa T, Ikeda S, Ohara O, Koga H. *Mol Oncol.* 2009 Feb
- 39 ARMS depletion facilitates UV irradiation induced apoptotic cell death in melanoma. Liao YH, Hsu SM, Huang PH. *Cancer Res.* 2007 Dec 15;67(24):11547-

40 Up-regulation of Flotillin-2 is associated with melanoma progression and modulates expression of the thrombin receptor protease activated receptor 1. Hazari  
41 High flotillin-2 expression is associated with lymph node metastasis and Breslow depth in melanoma. Doherty SD, Prieto VG, George S, Hazarika P, Duvic N  
42 Identification of differentially expressed genes in metastatic and non-metastatic nasopharyngeal carcinoma cells by suppression subtractive hybridization. Yan  
43 Flotillin-2 is associated with breast cancer progression and poor survival outcomes. Wang X, Yang Q, Guo L, Li XH, Zhao XH, Song LB, Lin HX. *J Transl M*  
44 Trefoil factor-3 expression in human colon cancer liver metastasis. Babyatsky M, Lin J, Yio X, Chen A, Zhang JY, Zheng Y, Twyman C, Bao X, Schwartz M  
45 Expression of trefoil peptides (TFF1, TFF2, and TFF3) in gastric carcinomas, intestinal metaplasia, and non-neoplastic gastric tissues. Leung WK, Yu J, Chan  
46 Intestinal trefoil factor (TFF 3) and pS2 (TFF 1), but not spasmodic polypeptide (TFF 2) mRNAs are co-expressed in normal, hyperplastic, and neoplastic hu  
47 A comparative analysis by SAGE of gene expression profiles of esophageal adenocarcinoma and esophageal squamous cell carcinoma. van Baal JW, Milana I  
48 Plasma levels of trefoil factors are increased in patients with advanced prostate cancer. Vestergaard EM, Borre M, Poulsen SS, Nexø E, Tørring N. *Clin Canc*  
49 Minichromosome maintenance protein 2 (MCM2) is a stronger discriminator of increased proliferation in mucosa adjacent to colorectal cancer than Ki-67. He  
50 Prognostic significance of metallothionein expression in correlation with Ki-67 expression in adenocarcinomas of large intestine. Dziegiel P, Forgacz J, Suder  
51 Prognostic value of thymidylate synthase, Ki-67, and p53 in patients with Dukes' B and C colon cancer: a National Cancer Institute-National Surgical Adjuva  
52 Immunohistochemical expression of p53, Bcl-2, and Ki-67 proteins in traditional serrated adenomas of colon. Jung JH, Kwon HJ, Kim TJ, Cho HJ, Kim HK, I  
53 Analysis of differential gene expression in colorectal cancer and stroma using fluorescence-activated cell sorting purification. Smith MJ, Culhane AC, Donova  
54 Combination of strong MMP-2 and weak TIMP-2 immunostainings is a significant prognostic factor in endometrial carcinoma. Honkavuori-Toivola M, Santal  
55 Expression of matrix metalloproteinases 1, 2, 9 and their tissue inhibitors in stage II non-small cell lung cancer: implications for MMP inhibition therapy. Pritc  
56 In situ detection of matrix metalloproteinase-2 (MMP2) and the metalloproteinase inhibitor TIMP2 transcripts in human primary hepatocellular carcinoma and  
57 Expression of tight and adherens junction proteins in ulcerative colitis associated colorectal carcinoma: upregulation of claudin-1, claudin-3, claudin-4, and be  
58 The claudin gene family: expression in normal and neoplastic tissues. Hewitt KJ, Agarwal R, Morin PJ. *BMC Cancer*. 2006 Jul 12;6:186.  
59 Claudins upregulation in human colorectal cancer. de Oliveira SS, de Oliveira IM, De Souza W, Morgado-Diaz JA. *FEBS Lett*. 2005 Nov 7;579(27):6179-85  
60 Claudin-3 gene silencing with siRNA suppresses ovarian tumor growth and metastasis. Huang YH, Bao Y, Peng W, Goldberg M, Love K, Bumcrot DA, Cole  
61 Claudins 2, 3, 4, and 5 in Paget's disease and breast carcinoma. Soini Y. *Hum Pathol*. 2004 Dec;35(12):1531-6.  
62 Immunohistochemical profiles of claudin-3 in primary and metastatic prostatic adenocarcinoma. Bartholow TL, Chandran UR, Becich MJ, Parwani AV. *Diag*  
63 Expression of metallothionein-3 in esophageal cancer and its correlations to expression of metallothionein-1 and -2. Tian ZQ, Wang XL, Wu W, Ai Zheng, C  
64 Hypermethylation of metallothionein-3 CpG island in gastric carcinoma. Deng D, El-Rifai W, Ji J, Zhu B, Tramont P, Li J, Smith MF, Powel SM. *Carcinoge*  
65 Expression of MT-3 mRNA in human kidney, proximal tubule cell cultures, and renal cell carcinoma. Hoey JG, Garrett SH, Sens MA, Todd JH, Sens DA. *Tc*  
66 Metallothionein 3: an androgen-upregulated gene enhances cell invasion and tumorigenesis of prostate carcinoma cells. Juang HH1, Chung LC, Sung HC, Fe  
67 Differential gene expression of Eph receptors and ephrins in benign human tissues and cancers. Hafner C, Schmitz G, Meyer S, Bataille F, Lau P, Langmann F  
68 DNA-based assay for EPHB6 expression in breast carcinoma cells as a potential diagnostic test for detecting tumor cells in circulation. Fox BP, Kandpal RP.  
69 Identification of EphB6 variant-derived epitope peptides recognized by cytotoxic T-lymphocytes from HLA-A24+ malignant glioma patients. Jin M, Komohau  
70 High-throughput analysis of genome-wide receptor tyrosine kinase expression in human cancers identifies potential novel drug targets. Muller-Tidow C, Schw  
71 EphB6 receptor significantly alters invasiveness and other phenotypic characteristics of human breast carcinoma cells. Fox BP, Kandpal RP. *Oncogene*. 2009  
72 Expression of human alpha(1,3)fucosyltransferase antisense sequences inhibits selectin-mediated adhesion and liver metastasis of colon carcinoma cells. West  
73 Different expression levels of alpha3/4 fucosyltransferases and Lewis determinants in ovarian carcinoma tissues and cell lines. Escrevente C, Machado E, Brit  
74 Role of fucosyltransferases in the association between apomucin and Lewis antigen expression in normal and malignant gastric epithelium. Lopez-Ferrer A, de  
75 Molecular cloning of MINK, a novel member of mammalian GCK family kinases, which is up-regulated during postnatal mouse cerebral development. Dan I  
76 Identification and functional characterization of a novel human misshapen/Nek interacting kinase-related kinase, hMINK beta. Hu Y, Leo C, Yu S, Huang BC  
77 Mink1 regulates  $\beta$ -catenin-independent Wnt signaling via Prickle phosphorylation. Daulat AM, Luu O, Sing A, Zhang L, Wrana JL, McNeill H, Winklbauer F  
78 Transcript analyses of stromal cell derived factors (SDFs): SDF-2, SDF-4 and SDF-5 reveal a different pattern of expression and prognostic association in hu  
79 Genomic and transcriptomic prognostic factors in R0 Dukes B and C colorectal cancer patients. Vendrell E, Ribas M, Valls J, Sole X, Grau M, Moreno V, C  
80 Increased expression of perforin and granzyme B genes in patients with metastatic melanoma treated with recombinant interleukin-2. Leger-Ravet MB, Mathi  
81 Long-range epigenetic silencing at 2q14.2 affects most human colorectal cancers and may have application as a non-invasive biomarker of disease. Mayor R,  
82 Inhibin/activin subunits (inhibin-alpha, -betaA and -betaB) are differentially expressed in human breast cancer and their metastasis. Mylonas I, Jeschke U, Sh  
83 Current smoking-specific gene expression signature in normal bronchial epithelium is enhanced in squamous cell lung cancer. Boelens MC, van den Berg A, F  
84 Inhibin beta B: a useful tumor marker in uterine endometrioid adenocarcinomas? Mylonas I. *Histol Histopathol*. 2011 Nov;26(11):1415-22.  
85 Indirect activation of blood coagulation in colon cancer. Wojtkiewicz MZ, Zacharski LR, Memoli VA, Kisiel W, Kudryk BJ, Rousseau SM, Stump DC. *Thr*  
86 Differential expression of angiogenesis associated genes in prostate cancer bone, liver and lymph node metastases. Morrissey C, True LD, Roudier MP, Cole  
87 Hyaluronan-CD44 interaction with IQGAP1 promotes Cdc42 and ERK signaling, leading to actin binding, Elk-1/estrogen receptor transcriptional activation, a  
88 Clinicopathologic significance of KIAA1199 overexpression in human gastric cancer. Matsuzaki S, Tanaka F, Mimori K, Tahara K, Inoue H, Mori M. *Ann St*  
89 Early insights into the function of KIAA1199, a markedly overexpressed protein in human colorectal tumors. Tiwari A, Schneider M, Fiorino A, Haider R, Ok  
90 Transcriptional and epigenetic regulation of KIAA1199 gene expression in human breast cancer. Kuscic C, Evensen N, Kim D, Hu YJ, Zucker S, Cao J. *PLoS*  
91 The calcineurin-binding protein cain is a negative regulator of synaptic vesicle endocytosis. Lai MM, Luo HR, Burnett PE, Hong JJ, Snyder SH. *J Biol Chem*  
92 Gamma subunit of the AP-1 adaptor complex binds clathrin: implications for cooperative binding in coated vesicle assembly. Doray B, Kornfeld S. *Mol Biol C*  
93 ARH cooperates with AP-1B in the exocytosis of LDLR in polarized epithelial cells. Kang RS, Fölsch H. *J Cell Biol*. 2011 Apr 4;193(1):51-60. doi: 10.1083/  
94 EpsinR: an AP1/clathrin interacting protein involved in vesicle trafficking. Mills IG, Praefcke GJ, Vallis Y, Peter BJ, Olesen LE, Gallop JL, Butler PJ, Evans  
95 Colon cancer secreted protein-2 (CCSP-2), a novel candidate serological marker of colon neoplasia. Xin B, Platzer P, Fink SP, Reese L, Nosrati A, Willson J  
96 Pancreatic Expression of DOG1: A Novel Gastrointestinal Stromal Tumor (GIST) Biomarker. Ardeleanu C, Arsene D, Hinescu M, Andrei F, Gutu D, Luca L  
97 A novel monoclonal antibody against DOG1 is a sensitive and specific marker for gastrointestinal stromal tumors. Espinosa I, Lee CH, Kim MK, Rouse BT, S  
98 TMEM16A alternative splicing coordination in breast cancer. Ubbly I, Bussani E, Colonna A, Stacul G, Locatelli M, Scudieri P, Galletta L, Pagani F. *Mol Ca*  
99 Ubiquitin-ribosomal protein S27a gene overexpressed in human colorectal carcinoma is an early growth response gene. Wong JM, Mafune K, Yow H, Rivers  
100 Metallopanstimulin as a novel tumor marker in sera of patients with various types of common cancers: implications for prevention and therapy. Fernandez-Pol  
101 Identification of metallopanstimulin-1 as a member of a tumor associated antigen in patients with breast cancer. Atsuta Y, Aoki N, Sato K, Oikawa K, Nochi I  
102 In vitro and in vivo evidence of metallopanstimulin-1 in gastric cancer progression and tumorigenicity. Wang YW, Qu Y, Li JF, Chen XH, Liu BY, Gu QL, Z  
103 Genes for human general transcription initiation factors TFIIB, TFIIB-associated proteins, TFIIC2 and PTF/SNAPC: functional and positional candidates fo  
104 RNA polymerase III transcription factor TFIIC2 is overexpressed in ovarian tumors. Winter AG, Sourvinos G, Allison SJ, Tosh K, Scott PH, Spandidos DA,  
105 Epigenetic silencing of a Ca(2+)-regulated Ras GTPase-activating protein RASAL defines a new mechanism of Ras activation in human cancers. Jin H, Wang  
106 Gene expression profiling in hepatocellular carcinoma: upregulation of genes in amplified chromosome regions. Skawran B, Steinemann D, Weigmann A, Flei  
107 IQGAPs in cancer: a family of scaffold proteins underlying tumorigenesis. White CD, Brown MD, Sacks DB. *FEBS Lett*. 2009 Jun 18;583(12):1817-24.  
108 Serological identification and bioinformatics analysis of immunogenic antigens in multiple myeloma. Zhou FL, Zhang WG, Chen G, Zhao WH, Cao XM, Che  
109 Calpain5 expression is decreased in endometriosis and regulated by HOXA10 in human endometrial cells. Penna I, Du H, Ferriani R, Taylor HS. *Mol Hum Re*  
110 Significance of the expression of proliferation-associated nucleolar antigen p120 in human colorectal tumors. Ueki T, Nakayama Y, Sugao Y, Kohno K, Matsu  
111 Altered transcription control is responsible for the increased level of proliferation-associated P120 in rapidly growing breast carcinoma. Fonagy A, Swiderski  
112 Prognostic value of nucleolar protein p120 in patients with resected lung adenocarcinoma. Sato G, Saijo Y, Uchiyama B, Kumano N, Sugawara S, Fujimura S  
113 Differential gene expression profile reveals deregulation of pregnancy specific beta1 glycoprotein 9 early during colorectal carcinogenesis. Salahshor S, Gonc  
114 Oncofetal markers CA 19-9, CA 125 and SP1 in healthy children and in children with malignancy. Heikinheimo M, Rajantie J, Kuusela P, Kallio MJ, Siimes I  
115 Prognostic factors in breast cancer: immunohistochemical staining for SP1 and NCR3 related to survival, tumour epidermal growth factor receptor and oes  
116 Molecular and functional characterization of choline transporter in human colon carcinoma HT-29 cells. Kouji H, Inazu M, Yamada T, Tajima H, Aoki T, Ma  
117 Phosphoglycerate mutase, 2,3-bisphosphoglycerate phosphatase and enolase activity and isoenzymes in lung, colon and liver carcinomas. Durany N, Joseph J  
118 Over-expression of gastrin-releasing peptide in human esophageal squamous cell carcinomas. Fang MZ, Liu C, Song Y, Yang GY, Nie Y, Liao J, Zhao X, Sh  
119 Endocrine fibroblast growth factor FGF19 promotes prostate cancer progression. Feng S, Dakhova O, Creighton CJ, Ittmann M. *Cancer Res*. 2013 Apr 15;73  
120 Targeting FGF19 inhibits tumor growth in colon cancer xenograft and FGF19 transgenic hepatocellular carcinoma models. Desnoyers LR, Pai R, Ferrando RE  
121 Silencing of Peroxiredoxin 2 and aberrant methylation of 33 CpG islands in putative promoter regions in human malignant melanomas. Furuta J, Nobeyama Y

122 MFng is dispensable for mouse pancreas development and function. Svensson P, Bergqvist I, Norlin S, Edlund H. Mol Cell Biol. 2009 Apr;29(8):2129-38.

---

**Criterion 6**

---

Yes

Yes

---

Yes

Yes

No

Yes

---

No

No

Yes

No

Yes

No

Yes

No

No

Yes

Yes

Yes

Yes

No

No

No

Yes

Yes

Yes  
Yes  
Yes  
No  
No  
Yes  
No  
Yes  
Yes  
Yes  
No  
Yes  
Yes  
Yes  
Yes  
Yes  
Yes  
Yes  
Yes

---

Ther. 2008 Feb;7(2):280-5.  
15;12(10):3057-63.

ulating ERK signaling pathway. Liu T, Liu Y, Bao X, Tian J, Liu Y, Yang X. PLoS One. 2013 Sep 27;8(9):e75864.

i K, Hawthorn L, Beall S, Geradts J. Clin Cancer Res. 2005 Jun 15;11(12):4357-64.

Wang GQ, Pan ZZ, Zhou ZW, Yun JP, Zhang MF, Wan DS. Int J Colorectal Dis. 2009 Aug;24(8):875-84. Epub 2009 May 7.

G, Spizzo G. Br J Cancer. 2008 Oct 21;99(8):1290-5. Epub 2008 Sep 23.

stein E. Proteomics. 2006 Dec;6(24):6447-54.

ncer. 2009 Apr 1;9:102.

Kawai S, Kosaka M, Ozaki S, Chain B, Yong KL. Clin Cancer Res. 2005 May 1;11(9):3377-84.

ada S, Morimoto A, Matsuzaki S, Ueda Y, Yoshino K, Fujita M, Kyo S, Iwahori K, Fujimoto M, Kimura T, Naka T. Int J Cancer. 2013 Jan 15;132(2):472-84

Abe M, Koishihara Y, Matsumoto T. Blood. 1997 Oct 15;90(8):3179-86.

he R, Liebenberg V, Ebert M, Molnar B, Grutzmann R, Pilarsky C, Sledziewski A. Clin Chem. 2008 Feb;54(2):414-23. Epub 2007 Dec 18.

na S, Jones RL, Savage K, James M, Milanezi F, Schmitt FC, Ashworth A. Mod Pathol. 2006 Feb;19(2):307-19.

ie I, Pierotti MA, Luksch R, Gasparini M, Collini P, Pilotti S, Rizzetti MG, Mondellini P, De Bernardi B, et al. Int J Cancer. 1993 Jun 19;54(4):540-5.

, Lau SY, Ellis MJ, Perou CM, Bernard PS, Nielsen TO. Mod Pathol. 2013 Nov;26(11):1438-50

ang S, Zhu M. Eur J Surg Oncol. 2009 Aug;35(8):826-32. Epub 2008 Nov 28.

Kuick R, Schwartz DR, Fearon ER, Cho KR. Cancer Res. 2006 Feb 1;66(3):1354-62.

Ikeda K, Kurokawa T. Neurosurgery. 1998 Aug;43(2):337-46.

leLapeyriere O. Int J Cancer. 1995 Apr 10;61(2):170-6.

PH, Chang JT, Kuo YC, Ko JL, Lin P. Int J Cancer. 2009 Aug 15;125(4):807-15.

PLoS One. 2013 Aug 28;8(8):e72662.

armacol. 2009 Jul 19.

2):430-8. Epub 2005 May 18.

i Rep. 2013 Nov 1;3:3120.

Bourdon V, Chaganti S, Arias-Pulido H, Nandula SV, Rao PH, Gissmann L, Durst M, Schneider A, Pothuri B, Mansukhani M, Basso K, Chaganti RS, Murty VV. Genes

Ahmedi R, Herold-Mende C, Keppler D, Nies AT. Cancer Res. 2005 Dec 15;65(24):11419-28.

Speed TP, Simpson RJ. Biochim Biophys Acta. 2013 Nov;1834(11):2396-407.

Del Governatore M, Coppola D, Yeatman TJ, Lenzi L, Caira A, Zanotti S, Taffurelli M, Carinci P, Valvassori L, Strippoli P. Int J Oncol. 2004 Oct;25(4):1049-56.

:260-3. Epub 2006 Feb 10.

:alez FJ, Laboisie CL, Denis MG. Int J Cancer. 2009 Jun 23.

Cafferata EG, Maccio DR, Lopez MV, Viale DL, Carbone C, Mazzolini G, Podhajcer OL. Clin Cancer Res. 2009 May 1;15(9):3037-49. Epub 2009 Mar 31.

4, Leu RA, Branton D, Chishti AH. J Biol Chem. 1995 Jan 13;270(2):715-9.

thr KE, Marfatia SM, Chishti AH. Genomics. 1996 Jan 15;31(2):223-9.

.. Proc Natl Acad Sci U S A. 1991 Aug 1;88(15):6595-9.

n vitro mutagenesis. Marfatia SM, Morais-Cabral JH, Kim AC, Byron O, Chishti AH. J Biol Chem. 1997 Sep 26;272(39):24191-7.

b;3(1):54-66. Epub 2008 Nov 6.

-56.

ka P, McCarty MF, Prieto VG, George S, Babu D, Koul D, Bar-Eli M, Duvic M. *Cancer Res.* 2004 Oct 15;64(20):7361-9.

4. *Melanoma Res.* 2006 Oct;16(5):461-3.

g XY, Ren CP, Wang L, Li H, Jiang CJ, Zhang HB, Zhao M, Yao KT. *Cell Oncol.* 2005;27(4):215-23.

led. 2013 Aug 15;11:190.

I, Thung S, Lawrence Werther J, Itzkowitz S. *Clin Exp Metastasis.* 2009;26(2):143-51. Epub 2008 Nov 2.

1 FK, To KF, Chan MW, Ebert MP, Ng EK, Chung SC, Malfertheiner P, Sung JJ. *J Pathol.* 2002 Aug;197(5):582-8.

man breast epithelium. Poulson R, Hanby AM, Lalani EN, Hauser F, Hoffmann W, Stamp GW. *J Pathol.* 1997 Sep;183(1):30-8.

F, Rygiel AM, Sondermeijer CM, Spek CA, Bergman JJ, Peppelenbosch MP, Krishnadath KK. *Cell Oncol.* 2008;30(1):63-75.

er Res. 2006 Feb 1;12(3 Pt 1):807-12.

inna-Morris A, Badvie S, Cohen P, McCullough T, Andreyev HJ, Allen-Mersh TG. *J Clin Pathol.* 2009 Apr;62(4):325-30. Epub 2008 May 12.

E, Surowiak P, Kornafel J, Zabel M. *Histol Histopathol.* 2003 Apr;18(2):401-7.

nt Breast and Bowel Project collaborative study. Allegra CJ, Paik S, Colangelo LH, Parr AL, Kirsch I, Kim G, Klein P, Johnston PG, Wolmark N, Wieand HS. *J Clin Oncol* Cheung DY, Kim JI, Kim JK. *Korean J Gastroenterol.* 2013 Dec;62(6):336-43.

in M, Coffey JC, Barry BD, Kelly MA, Higgins DG, Wang JH, Kirwan WO, Cotter TG, Redmond HP. *Br J Cancer.* 2009 May 5;100(9):1452-64.

la M, Soini Y, Turpeenniemi-Hujanen T, Talvensaari-Mattila A. *Dis Markers.* 2013;35(4):261-6.

hard SC, Nicolson MC, Lloret C, McKay JA, Ross VG, Kerr KM, Murray GI, McLeod HL. *Oncol Rep.* 2001 Mar-Apr;8(2):421-4.

l in liver metastasis. Musso O, Theret N, Champion JP, Turlin B, Milani S, Grappone C, Clement B. *J Hepatol.* 1997 Mar;26(3):593-605.

ta-catenin. Mees ST, Mennigen R, Spieker T, Rijcken E, Senninger N, Haier J, Bruewer M. *Int J Colorectal Dis.* 2009 Apr;24(4):361-8. Epub 2009 Jan 29.

. Epub 2005 Oct 13.

: G, Langer R, Anderson DG, Sawicki JA. *Proc Natl Acad Sci U S A.* 2009 Mar 3;106(9):3426-30. Epub 2009 Feb 10.

n *Pathol.* 2011 Jan 21;6:12.

08 Feb;27(2):160-4. Chinese.

nesis. 2003 Jan;24(1):25-9.

xicol Lett. 1997 Jul 21;92(2):149-60.

ig TH, Lee YH, Chang PL, Tsui KH. *Prostate.* 2013 Oct;73(14):1495-506.

T, Dietmaier W, Landthaler M, Vogt T. *Clin Chem.* 2004 Mar;50(3):490-9. Epub 2004 Jan 15.

Cancer Genomics Proteomics. 2010 Jan-Feb;7(1):9-16.

ra Y, Shichijo S, Harada M, Yamanaka R, Miyamoto S, Nikawa J, Itoh K, Yamada A. *Oncol Rep.* 2008 May;19(5):1277-83.

able J, Steffen B, Tidow N, Brandt B, Becker K, Schulze-Bahr E, Hallter H, Vogt U, Metzger R, Schneider PM, Buchner T, Brandts C, Berdel WE, Serve H. *Clin Cancer* Apr 9;28(14):1706-13. Epub 2009 Feb 23.

ton BW, Hiller KM, Mayben JP, Manousos GA, Bendt KM, Liu R, Cusack JC Jr. *Cancer Res.* 1999 May 1;59(9):2127-35.

to C, Reis CA, Stoeck A, Runz S, Marme A, Altevogt P, Costa J. *Int J Oncol.* 2006 Sep;29(3):557-66.

e Bolos C, Barranco C, Garrido M, Isern J, Carlstedt I, Reis CA, Torrado J, Real FX. *Gut.* 2000 Sep;47(3):349-56.

Watanabe NM, Kobayashi T, Yamashita-Suzuki K, Fukagaya Y, Kajikawa E, Kimura WK, Nakashima TM, Matsumoto K, Ninomiya-Tsuji J, Kusumi A. *FEBS Lett.* 2000 ; Wang H, Shen M, Luo Y, Daniel-Issakani S, Payan DG, Xu X. *J Biol Chem.* 2004 Dec 24;279(52):54387-97

ł, Angers S. *Mol Cell Biol.* 2012 Jan;32(1):173-85.

nan breast cancer. Kang H, Escudero-Esparza A, Douglas-Jones A, Mansel RE, Jiang WG. *Int J Oncol.* 2009 Jul;35(1):205-11.

apella G, Peinado MA. *Int J Oncol.* 2007 May;30(5):1099-107.

ot C, Portier A, Brandely M, Galanaud P, Fridman WH, Emilie D. *Cancer Immunol Immunother.* 1994 Jul;39(1):53-8.

Casadome L, Azuara D, Moreno V, Clark SJ, Capella G, Peinado MA. *Br J Cancer.* 2009 May 19;100(10):1534-9. Epub 2009 Apr 21.

ibani N, Kuhn C, Friese K, Gerber B. *Oncol Rep.* 2005 Jan;13(1):81-8.

ehrmann RS, Geerlings M, de Jong WK, te Meerman GJ, Sietsma H, Timens W, Postma DS, Groen HJ. *J Pathol.* 2009 Jun;218(2):182-91.

omb Haemost. 1989 Dec 29;62(4):1062-6.

man IM, Hawley S, Nelson PS, Coleman R, Wang YC, Corey E, Lange PH, Higano CS, Vessella RL. *Clin Exp Metastasis.* 2008;25(4):377-88. Epub 2007 Oct 31.

and ovarian cancer progression. Bourguignon LY, Gilad E, Rothman K, Peyrollier K. *J Biol Chem.* 2005 Mar 25;280(12):11961-72. Epub 2005 Jan 17.

urg *Oncol.* 2009 Jul;16(7):2042-51. Epub 2009 May 12.

omiewski MJ, Roschitzki B, Uzozie A, Menigatti M, Jiricny J, Marra G. *PLoS One.* 2013 Jul 23;8(7):e69473

; *One.* 2012;7(9):e44661.

. 2000 Nov 3;275(44):34017-20.

Cell. 2001 Jul;12(7):1925-35.

fcb.201012121. Epub 2011 Mar 28.

PR, McMahon HT. *J Cell Biol.* 2003 Jan 20;160(2):213-22. Epub 2003 Jan 21.

K, Wilson K, Markowitz S. *Oncogene.* 2005 Jan 20;24(4):724-31.

, Popescu LM. *Appl Immunohistochem Mol Morphol.* 2009 May 4.

Subramanian S, Montgomery K, Varma S, Corless CL, Heinrich MC, Smith KS, Wang Z, Rubin B, Nielsen TO, Seitz RS, Ross DT, West RB, Cleary ML, van de Rijn M. *Cancer.* 2013 Jul 16;12:75.

EN, Ravikumar TS, Steele GD Jr, Chen LB. *Cancer Res.* 1993 Apr 15;53(8):1916-20.

l JA. *Anticancer Res.* 1996 Jul-Aug;16(4B):2177-85.

H, Miyokawa N, Hirata S, Kimura S, Sasajima T, Katagiri M. *Cancer Lett.* 2002 Aug 8;182(1):101-7.

hu ZG. *Clin Cancer Res.* 2006 Aug 15;12(16):4965-73.

or tumour predisposition or inherited genetic diseases? Purrello M, Di Pietro C, Rapisarda A, Amico V, Giunta V, Engel H, Stevens S, Hsieh Y, Teichman M, Wang Z, Sic , White RJ. *Proc Natl Acad Sci U S A.* 2000 Nov 7;97(23):12619-24.

g X, Ying J, Wong AH, Cui Y, Srivastava G, Shen ZY, Li EM, Zhang Q, Jin J, Kupzig S, Chan AT, Cullen PJ, Tao Q. *Proc Natl Acad Sci U S A.* 2007 Jul 24;104(30):123

mming P, Becker T, Flik J, Kreipe H, Schlegelberger B, Wilkens L. *Mod Pathol.* 2008 May;21(5):505-16.

n YX, Tian W, Liu J, Liu SH. *Cancer Immunol Immunother.* 2006 Aug;55(8):910-7.

eprod. 2008 Oct;14(10):613-8.

io K, Sugimoto Y, Yamada Y, Kuwano M, Tsuneyoshi M. *Hum Pathol.* 1997 Jan;28(1):74-9.

C, Freeman JW. *Int J Cancer.* 1995 Jan 27;60(3):407-12.

l, Sato M, Sagawa M, Ohkuda K, Koike K, Minami Y, Satoh K, Nukiwa T. *J Clin Oncol.* 1999 Sep;17(9):2721-7.

alves J, Chetty R, Gallinger S, Woodgett JR. *BMC Cancer.* 2005 Jun 27;5:66.

MA. *Br J Cancer.* 1990 Nov;62(5):865-7.

rogen receptor status. Wright C, Angus B, Napier J, Wetherall M, Udagawa Y, Sainsbury JR, Johnston S, Carpenter F, Horne CH. *J Pathol.* 1987 Dec;153(4):325-31.

tsumiya T. *Arch Biochem Biophys.* 2009 Mar 1;483(1):90-8.

, Campo E, Molina R, Carreras J. *Br J Cancer.* 1997;75(7):969-77.

imada Y, Wang LD, Yang CS. *Carcinogenesis.* 2004 Jun;25(6):865-71.

(8):2551-62.

3, Hötzel K, Le T, Ross J, Carano R, D'Souza A, Qing J, Mohtashemi I, Ashkenazi A, French DM. *Oncogene.* 2008 Jan 3;27(1):85-97.

, Umebayashi Y, Otsuka F, Kikuchi K, Ushijima T. *Cancer Res.* 2006 Jun 15;66(12):6080-6.









ol. 2003 Jan 15;21(2):241-50.

Res. 2004 Feb 15;10(4):1241-9.

0 Mar 3;469(1):19-23.

Am J Surg Pathol. 2008 Feb;32(2):210-8.

hel G, Roeder R, Grzeschik KH. Oncogene. 2001 Aug 9;20(35):4877-83.

53-8.

**Supplemental Table 2.** Characteristics of all study subjects used in this study.

| Characteristics              | Used for ELISA        |             |                       |             | Used for IHC analysis<br>CRC case |
|------------------------------|-----------------------|-------------|-----------------------|-------------|-----------------------------------|
|                              | 1 <sup>st</sup> phase |             | 2 <sup>nd</sup> phase |             |                                   |
|                              | CRC Case              | Control     | CRC Case              | Control     |                                   |
| <b>Age (yr, median ±SEM)</b> | 67.5 ± 12.3           | 43.1 ± 12.7 | 65.3 ± 12.7           | 45.3 ± 10.1 | 62.9 ± 12.8                       |
| <b>Gender-Male [N, (% )]</b> | 22(68.8)              | 15(46.9)    | 73(60.8)              | 61(50.8)    | 74(56.1)                          |
| Female                       | 10(31.2)              | 17(53.1)    | 47(39.2)              | 59(49.2)    | 58(43.9)                          |
| <b>Location (Organ Code)</b> |                       |             |                       |             |                                   |
| Colon                        |                       |             | 62(51.7)              |             | 49(37.1)                          |
| Rectum                       |                       |             | 46(38.3)              |             | 70(53.0)                          |
| Others                       |                       |             | 12(10.0)              |             | 13(9.9)                           |
| <b>Histological grade</b>    |                       |             |                       |             |                                   |
| Well differentiation         |                       |             | 10(8.3)               |             | 25(18.9)                          |
| Moderate differentiation     |                       |             | 99(82.5)              |             | 96(72.7)                          |
| Poor differentiation         |                       |             | 10(8.3)               |             | 9(6.8)                            |
| Unknown                      |                       |             | 1(0.8)                |             | 2(1.5)                            |
| <b>Histological type</b>     |                       |             |                       |             |                                   |
| Adenocarcinoma               |                       |             | 115(95.8)             |             | 119(90.2)                         |
| Mucinous carcinoma           |                       |             | 4(3.3)                |             | 10(7.6)                           |
| Others                       |                       |             | 1(0.8)                |             | 3(2.3)                            |
| <b>TNM stage</b>             |                       |             |                       |             |                                   |
| 0/I/II                       |                       |             | 61(50.8)              |             | 67(60.8)                          |
| III/IV                       |                       |             | 59(49.2)              |             | 65(49.2)                          |
| <b>CEA level</b>             |                       |             |                       |             |                                   |
| < 5 ng/ml                    |                       |             | 93(77.5)              |             | 63(47.7)                          |
| ≥ 5 ng/ml                    |                       |             | 27(22.5)              |             | 64(48.5)                          |
| Unknown                      |                       |             | 0(0)                  |             | 5(3.8)                            |
| <b>Total case No.</b>        | 32                    | 32          | 120                   | 120         | 132                               |

**Supplemental Table 3.** Association of BST2 plasma levels with different clinicopathologic characteristics of the 120 CRC patients.

| <b>Characteristics</b>             | <b>Number</b> | <b>BST2 (ng/ml)</b> | <b><i>p</i>-value<sup>a</sup></b> |
|------------------------------------|---------------|---------------------|-----------------------------------|
| <b>Gender</b>                      |               |                     |                                   |
| Male                               | 73            | 2.40 ± 1.66         | 0.63                              |
| Female                             | 47            | 2.26 ± 1.21         |                                   |
| <b>Age (years)</b>                 |               |                     |                                   |
| < 65                               | 54            | 2.03 ± 1.63         | 0.03                              |
| ≥ 65                               | 66            | 2.61 ± 1.34         |                                   |
| <b>Location (Organ Code)</b>       |               |                     |                                   |
| Colon                              | 62            | 2.54 ± 1.67         | 0.70                              |
| Rectum                             | 46            | 2.12 ± 1.30         |                                   |
| <b>Histological grade</b>          |               |                     |                                   |
| Well differentiation               | 10            | 2.86 ± 1.69         |                                   |
| Moderate differentiation           | 99            | 2.25 ± 1.48         | 0.39                              |
| Poor differentiation               | 10            | 2.86 ± 1.46         |                                   |
| <b>Histological type</b>           |               |                     |                                   |
| Adenocarcinoma                     | 115           | 2.28 ± 1.48         | 0.05                              |
| Mucinous carcinoma                 | 3             | 4.63 ± 0.45         |                                   |
| <b>TNM stage</b>                   |               |                     |                                   |
| I/II                               | 61            | 2.42 ± 1.76         | 0.57                              |
| III/IV                             | 59            | 2.27 ± 1.18         |                                   |
| <b>Distant metastasis</b>          |               |                     |                                   |
| No                                 | 106           | 2.33 ± 1.55         | 0.83                              |
| Yes                                | 14            | 2.42 ± 1.06         |                                   |
| <b>CEA level</b>                   |               |                     |                                   |
| < 5 ng/ml                          | 93            | 2.18 ± 1.22         | 0.10                              |
| ≥ 5 ng/ml                          | 27            | 2.90 ± 2.13         |                                   |
| <b>Albumin</b>                     |               |                     |                                   |
| < 3.5 g/dL                         | 14            | 4.14 ± 2.46         | < 0.01                            |
| ≥ 3.5 g/dL                         | 105           | 2.12 ± 1.14         |                                   |
| <b>Three years DFS<sup>b</sup></b> |               |                     |                                   |
| < 3 years                          | 86            | 2.50 ± 1.67         | 0.02                              |
| ≥ 3 years                          | 34            | 1.95 ± 0.81         |                                   |
| <b>Chemotherapy</b>                |               |                     |                                   |
| No                                 | 56            | 2.41 ± 1.84         | 0.88                              |
| Yes                                | 64            | 2.36 ± 1.17         |                                   |

a: The *p*-values were determined by independent t test.

b: disease free survival

**Supplemental Table 4.** Association of BST2 IHC scores with different clinicopathologic characteristics of the 132 CRC patients.

| <b>Characteristics</b>       | <b>Number</b> | <b>IHC score</b> | <b><i>p</i>-value<sup>a</sup></b> |
|------------------------------|---------------|------------------|-----------------------------------|
| <b>Gender</b>                |               |                  |                                   |
| Male                         | 74            | 144.5 ± 87.3     | 0.39                              |
| Female                       | 58            | 137.7 ± 90.1     |                                   |
| <b>Age (years)</b>           |               |                  |                                   |
| < 65                         | 59            | 147.8 ± 85.2     | 0.15                              |
| ≥ 65                         | 73            | 136.5 ± 90.4     |                                   |
| <b>Location (Organ Code)</b> |               |                  |                                   |
| Colon                        | 49            | 145.5 ± 98.6     | 0.47                              |
| Rectum                       | 70            | 139.4 ± 83.1     |                                   |
| <b>Histological grade</b>    |               |                  |                                   |
| Well differentiation         | 25            | 144.4 ± 99.7     | 0.60                              |
| Moderate differentiation     | 96            | 139.1 ± 88.2     |                                   |
| Poor differentiation         | 9             | 152.2 ± 56.1     |                                   |
| <b>Histological type</b>     |               |                  |                                   |
| Adenocarcinoma               | 119           | 140.3 ± 89.9     | 0.92                              |
| Mucinous carcinoma           | 9             | 138.8 ± 68.2     |                                   |
| <b>TNM stage</b>             |               |                  |                                   |
| I/II                         | 67            | 133.7 ± 81.1     | 0.05                              |
| III/IV                       | 62            | 149.1 ± 94.7     |                                   |
| <b>Distant metastasis</b>    |               |                  |                                   |
| No                           | 115           | 138.9 ± 88.9     | 0.11                              |
| Yes                          | 16            | 158.1 ± 80.4     |                                   |
| <b>CEA level</b>             |               |                  |                                   |
| < 5 ng/ml                    | 63            | 135.1 ± 94.4     | 0.07                              |
| ≥ 5 ng/ml                    | 64            | 149.3 ± 82.7     |                                   |
| <b>Five years survival</b>   |               |                  |                                   |
| < 5 years                    | 59            | 155.9 ± 86.7     | < 0.01                            |
| ≥ 5 years                    | 73            | 130.0 ± 83.7     |                                   |
| <b>Chemotherapy</b>          |               |                  |                                   |
| No                           | 47            | 151.1 ± 86.9     | 0.06                              |
| Yes                          | 77            | 135.3 ± 89.1     |                                   |

a: The *p*-values were determined by independent t test.

**Fig. S1**

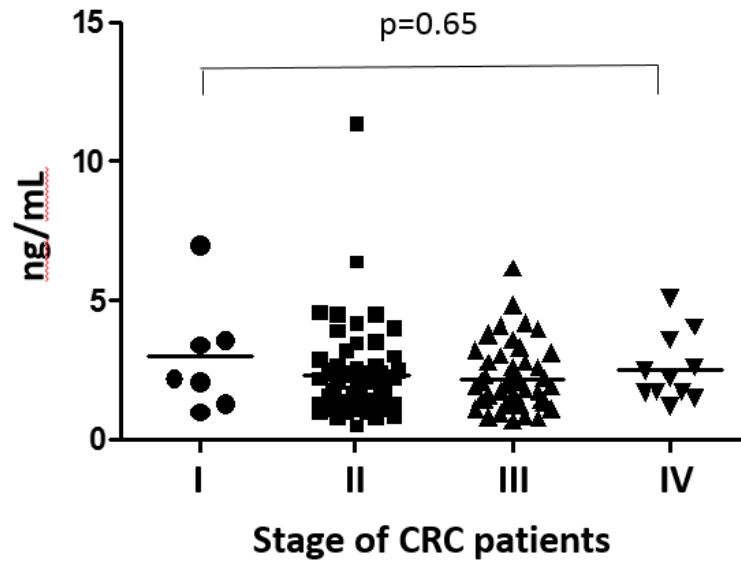

**Supplemental Figure 1.** The ELISA analysis of BST2 according to stages in CRC patients' plasma was shown. The BST2 serum level were  $2.20 \pm 1.15$  ng/mL (stage 1, n=7),  $2.08 \pm 0.74$  ng/mL (stage 2, n=56),  $1.90 \pm 0.73$  ng/mL (stage 3, n=46), and  $2.20 \pm 0.96$  ng/mL (stage 4, n=11). There was no statistical difference among all stages for CRC patients ( $p=0.65$ , ANOVA).
